# Supplementary material for: Crystalline MoS2-enhanced conductive black titania for efficient solar to chemical energy conversion: photocatalytic CO2 reduction and CH4 oxidation
Source: Royal Society of Chemistry journal article supplement (doi:10.1039/d2ta06742k), 2022-01-01
Supplement: d2ta06742k1.pdf [file d2ta06742k1.pdf]

## Supporting Information for

### **Crystalline MoS<sub>2</sub> enhanced conductive black titania for efficient solar to chemical conversions: photocatalytic CO<sub>2</sub> reduction and CH<sub>4</sub> oxidation**

**Qingyuan Bi,<sup>\*ab</sup> Min Wang,<sup>b</sup> Muhammad Sohail Riaz,<sup>c</sup> Xianlong Du,<sup>d</sup> Guisheng Li<sup>a</sup> and Fuqiang Huang<sup>\*be</sup>**

<sup>a</sup> School of Materials and Chemistry, University of Shanghai for Science and Technology, Shanghai 200093, P. R. China

<sup>b</sup> State Key Laboratory of High Performance Ceramics and Superfine Microstructure, Shanghai Institute of Ceramics, Chinese Academy of Sciences, Shanghai 200050, P. R. China

<sup>c</sup> School of Materials Science and Engineering, Gwangju Institute of Science and Technology, Gwangju 61005, Republic of Korea

<sup>d</sup> Key Laboratory of Interfacial Physics and Technology, Shanghai Institute of Applied Physics, Chinese Academy of Sciences, Shanghai 201800, P. R. China

<sup>e</sup> State Key Laboratory of Rare Earth Materials Chemistry and Applications, College of Chemistry and Molecular Engineering, Peking University, Beijing 100871, P. R. China

\* Corresponding Authors

Email: [qybi@usst.edu.cn](mailto:qybi@usst.edu.cn); [huangfq@mail.sic.ac.cn](mailto:huangfq@mail.sic.ac.cn)

## 1. Catalyst characterization

BET-specific surface areas of the prepared catalysts were determined by adsorption–desorption of N<sub>2</sub> at liquid nitrogen temperature using the Micromeritics ASAP 2460 equipment. Sample degassing was carried out at 300 °C before acquiring the adsorption isotherm.

X-ray diffraction (XRD) analysis was carried out on a Bruker D8 Advance X-ray diffractometer applying the Ni-filtered Cu K $\alpha$  radiation at 40 kV and 40 mA.

X-ray photoelectron spectroscopy (XPS) data were recorded with the Axis Ultra Photoelectron Spectrometer through a monochromatized Al K $\alpha$  anode (225 W, 15 kV, 15 mA). The C 1s peak located at 284.8 eV was employed as the reference for calibrating the binding energies (BE).

Raman spectra were recorded in a Thermal Dispersive Spectrometer applying a 10 mW laser with an excitation wavelength of 532 nm.

Ultraviolet-visible (UV-Vis) spectra were recorded on a Hitachi U4100 Spectrometer equipped with the integrating sphere and reference BaSO<sub>4</sub>. The solar absorption was obtained by the following equation (S1):

$$A = \frac{\int (1-T) \cdot S \cdot d\lambda}{\int S \cdot d\lambda} \quad (\text{S1})$$

Where  $A$  is the solar absorption,  $\lambda$  is the wavelength (nm),  $T$  is the reflectance,  $S$  is the light spectral irradiance (W m<sup>-2</sup> nm<sup>-1</sup>), and  $(1-T) \cdot S$  is the catalyst absorption of solar spectral irradiance.

Photoluminescence (PL) spectra were conducted at 320 nm using a MODEL Fluoro Max-3 fluorescence spectrophotometer at room temperature.

The photothermic effect was performed on a thermal infrared imager SC305 by irradiating an AM 1.5G Xe lamp solar simulator.

A JEOL 2011 microscope conducted at 200 kV coupled with an EDX unit (Si(Li) detector) was employed for the transmission electron microscopy (TEM) analysis.

A JEM 2100F electron microscope working at 200 kV coupled with an EDX unit (Si(Li) detector) was conducted for the high-resolution TEM (HRTEM) analysis.

CH<sub>4</sub> adsorption was measured by temperature-programmed desorption of CH<sub>4</sub> (CH<sub>4</sub>-TPD) experiments using

AutoChem HP 2950 apparatus. Typically, the catalyst (0.2 g) was pretreated at 200 °C for 2 h and then cooled to 50 °C in flowing Ar. Later, CH<sub>4</sub> gas was introduced until adsorption saturation (0.5 h), followed by purging with Ar flow (30 mL min<sup>-1</sup>) for 1 h. Subsequently, the temperature was raised from 50 to 600 °C (5 °C min<sup>-1</sup>) to desorb CH<sub>4</sub>. The desorbed CH<sub>4</sub> gas was determined by on-line gas chromatography (GC) with a thermal conductivity detector (TCD).

## 2. Solar to chemical energy conversion

*Photocatalytic CO<sub>2</sub> reduction:* The experiments were carried out in a high-pressure stainless autoclave reactor (100 mL) with a reflux condenser and a quartz window on the top. The solar light irradiation was from a 300 W Xe lamp (Aulight CEL-HX, Beijing), and the light power was calibrated to AM 1.5 by an NREL-calibrated Si cell (Oriel 91150). The visible light was attained using a light reflector of 400~780 nm, and the reflectivity was greater than 95%. Typically, 6 mL of deionized water was first added to the reactor. Then, a 50 mg sample was ultrasonically dispersed in 0.5 mL deionized water and drop-dried on a clean glass sheet, placing the holder in the vessel's upper region. Later, the autoclave was sealed, and the internal air gas was degassed completely using high-purity CO<sub>2</sub> twenty times at ambient temperature, and then 2 bar CO<sub>2</sub> gas was charged. The stirrer was started (800 rpm) when the light was irradiated. After a particular reaction, the reactor was placed into the cool water, and the inside gas was collected carefully. An Agilent 7820A GC analyzed the gaseous mixture and liquid product with a capillary column (HP-5) connected to an FID or a packed column (TDX-01) connected to a TCD. The electron-transferred CH<sub>4</sub> selectivity was calculated according to the following equation (S6):

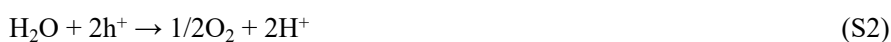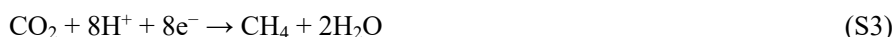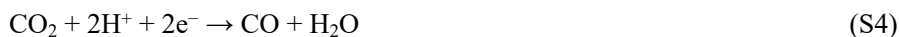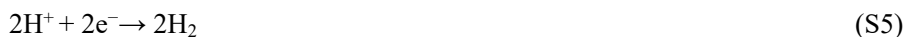

$$\text{CH}_4 \text{ selectivity (\%)} = 8n(\text{CH}_4)/[8n(\text{CH}_4) + 2n(\text{CO}) + 2n(\text{H}_2)] \times 100\% \quad (\text{S6})$$

Where  $n(\text{CH}_4)$ ,  $n(\text{CO})$ , and  $n(\text{H}_2)$  represent the moles of produced CH<sub>4</sub>, CO, and H<sub>2</sub>, note that three separate tests were carried out for each test. The stability was conducted on a 50 mg catalyst condition, 6 mL H<sub>2</sub>O, 2 bar CO<sub>2</sub>, and solar light irradiation for a continuous 5 h in each run. The used sample was washed with deionized water several times and dried overnight for reuse.

The STYs of CH<sub>4</sub>, CO, and H<sub>2</sub> were calculated according to the following equations (S7–S9):

$$\text{STY of CH}_4 = \frac{\text{Amount of CH}_4 (\mu\text{mol})}{\text{Catalyst amount (g)} \times \text{Reaction time (h)}} \quad (\text{S7})$$

$$\text{STY of CO} = \frac{\text{Amount of CO } (\mu\text{mol})}{\text{Catalyst amount (g)} \times \text{Reaction time (h)}} \quad (\text{S8})$$

$$\text{STY of H}_2 = \frac{\text{Amount of H}_2 (\mu\text{mol})}{\text{Catalyst amount (g)} \times \text{Reaction time (h)}} \quad (\text{S9})$$

*Photocatalytic CH<sub>4</sub> oxidation:* The reactions were conducted in a high-pressure stainless autoclave (50 mL) with a condenser and a quartz window on the top. Typically, 9 mL deionized water, 1 mL 30% H<sub>2</sub>O<sub>2</sub>, and 50 mg catalyst were placed in the reactor. The autoclave was sealed and degassed several times with 5 bar CH<sub>4</sub> to remove the internal air, then 20 bar CH<sub>4</sub> was charged. The stirrer (800 rpm) was started when the light was irradiated. The reactor's temperature was kept at room temperature. After a particular time, the reactor was placed in cool water, and the inside gas was collected carefully. The liquid mixture was transferred into a centrifuge tube, and the solid catalyst was separated by centrifugation. An Agilent 7820A GC analyzed both gaseous mixture and liquid product. Identification of the products was conducted using a GC-MS spectrometer (Shimadzu GCMS-QP2010 SE). Note that the total carbon balance of >95% was achieved, and three separate tests were carried out for each test. The centrifuged samples from parallel tests were collected, washed, and dried for reuse for the recycling reaction.

The STYs of methanol and ethanol were calculated according to the following equations (S10 and S11):

$$\text{STY of methanol} = \frac{\text{Amount of methanol } (\mu\text{mol})}{\text{Catalyst amount (g)} \times \text{Reaction time (h)}} \quad (\text{S10})$$

$$\text{STY of ethanol} = \frac{\text{Amount of ethanol } (\mu\text{mol})}{\text{Catalyst amount (g)} \times \text{Reaction time (h)}} \quad (\text{S11})$$

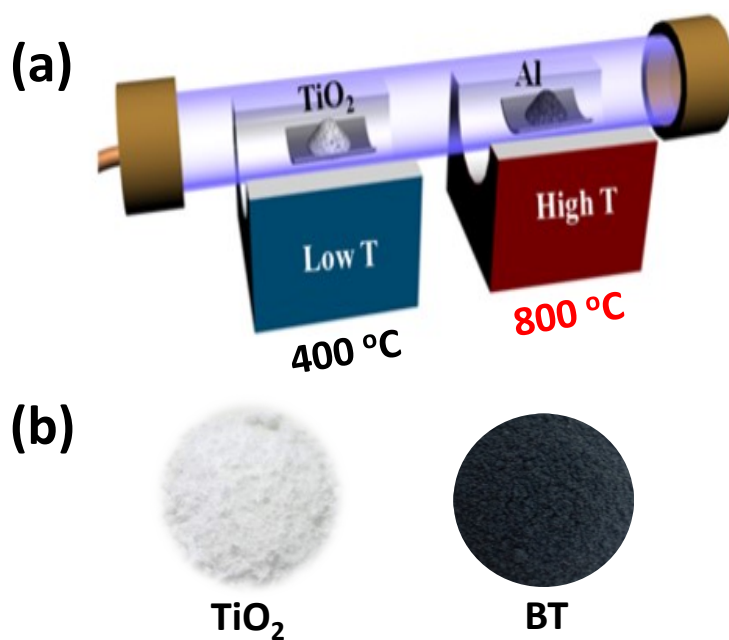

**Fig. S1** (a) Schematic diagram of the two-zone tube furnace for BT's preparation via Al reduction, and (b) photographs of pristine  $\text{TiO}_2$  and BT samples.

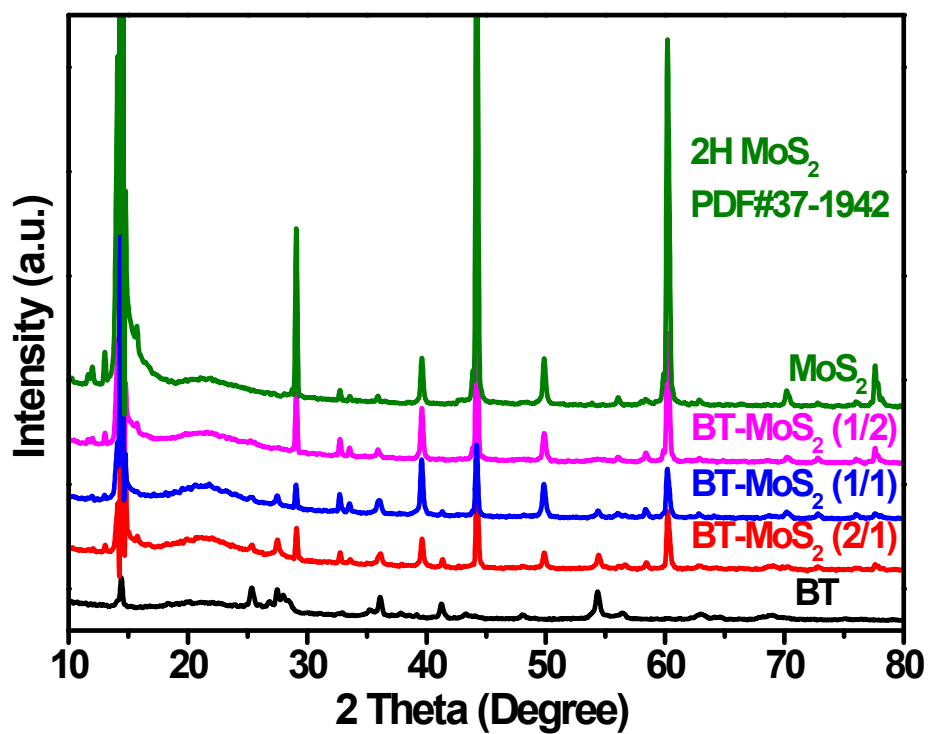

**Fig. S2** XRD patterns of  $\text{MoS}_2$ , BT, and BT- $\text{MoS}_2$  samples.

**Table S1.** Characteristics of MoS<sub>2</sub>, BT, and BT-MoS<sub>2</sub> samples.

| Sample                    | BET surface<br>area (m <sup>2</sup> g <sup>-1</sup> ) | Pore volume<br>(cm <sup>3</sup> g <sup>-1</sup> ) | Pore diameter<br>(nm) |
|---------------------------|-------------------------------------------------------|---------------------------------------------------|-----------------------|
| BT                        | 48.3                                                  | 0.1789                                            | 17.1                  |
| MoS <sub>2</sub>          | 31.5                                                  | 0.0973                                            | 10.2                  |
| BT-MoS <sub>2</sub> (2/1) | 45.9                                                  | 0.1405                                            | 14.1                  |
| BT-MoS <sub>2</sub> (1/1) | 50.2                                                  | 0.1079                                            | 12.5                  |
| BT-MoS <sub>2</sub> (1/2) | 46.7                                                  | 0.1275                                            | 11.0                  |

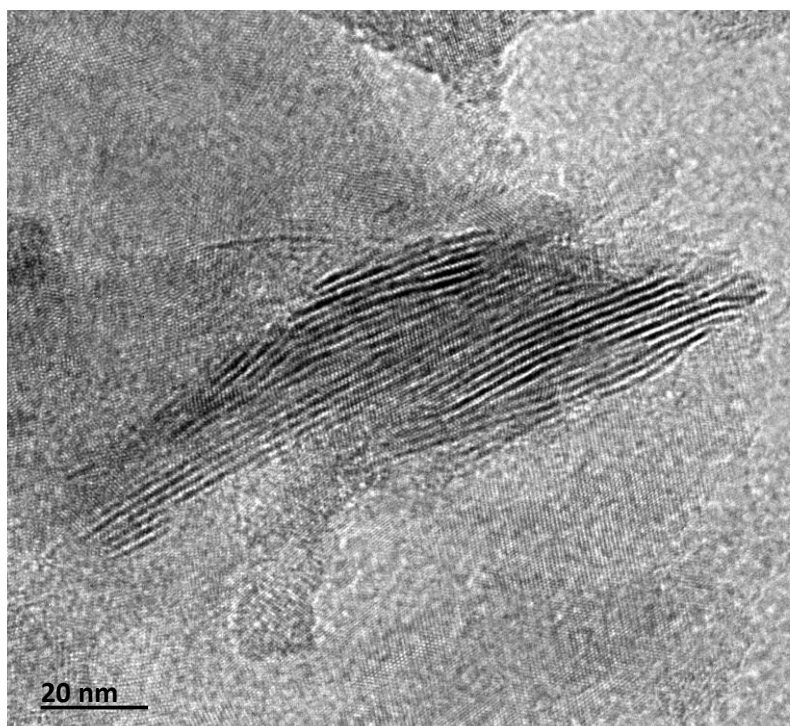

**Fig. S3** TEM image of MoS<sub>2</sub> catalyst.

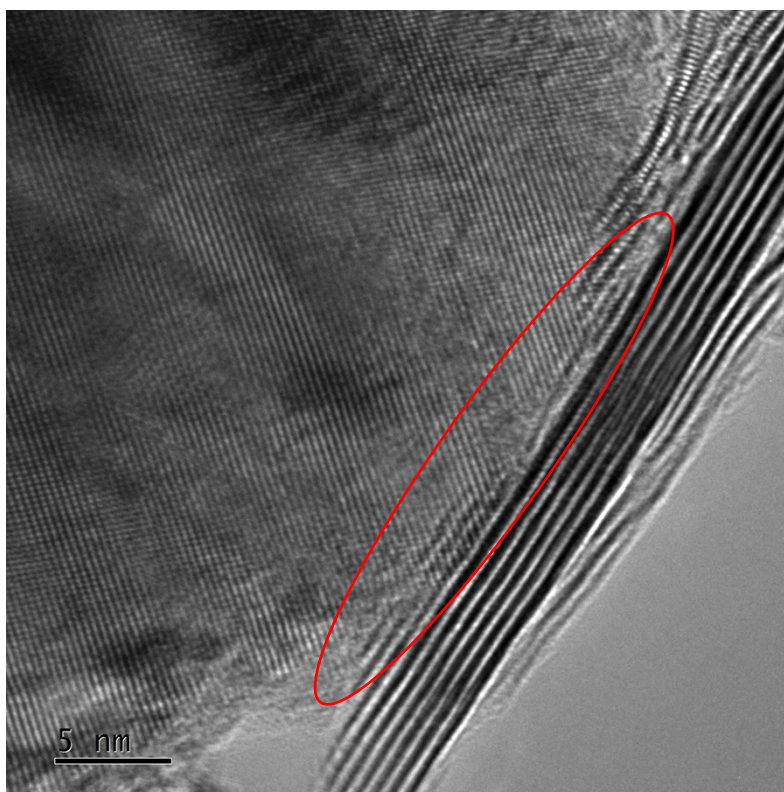

**Fig. S4** HRTEM image of BT-MoS<sub>2</sub> (1/1) catalyst. Note that the junctions in the red circle indicate strong synergy between BT and MoS<sub>2</sub> components.

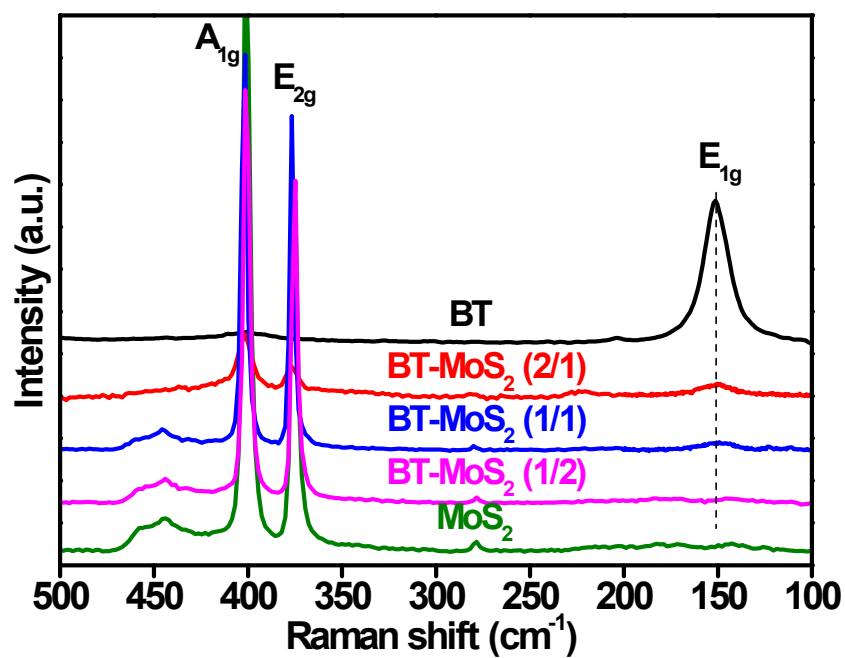

**Fig. S5** Raman spectra of MoS<sub>2</sub>, BT, and BT-MoS<sub>2</sub> samples.

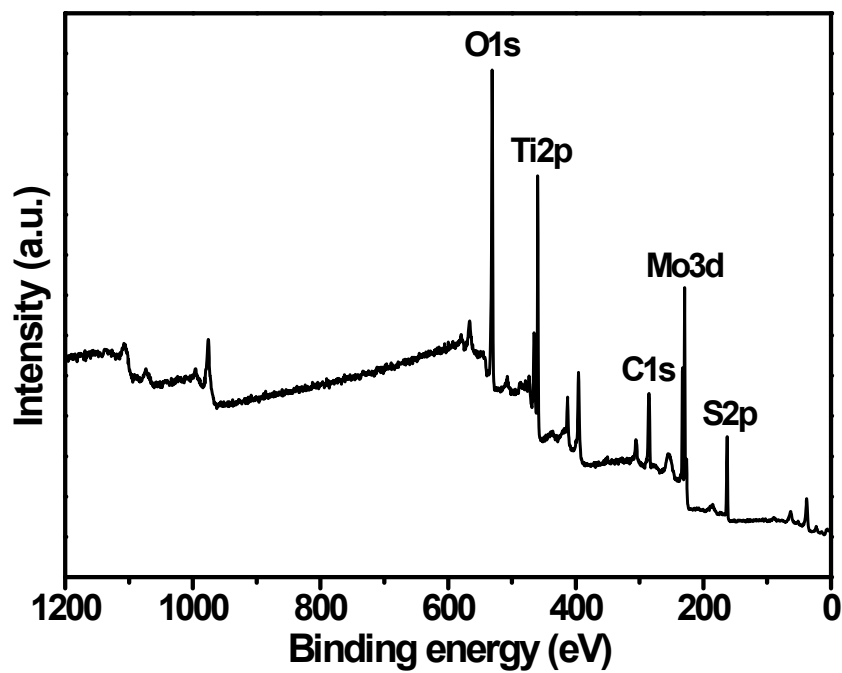

Fig. S6 Full XPS spectrum of BT-MoS<sub>2</sub> (1/1) catalyst.

Table S2. The proportion of Ti<sup>3+</sup>/Ti species of BT and BT-MoS<sub>2</sub> samples according to Ti2p<sub>3/2</sub> XPS data.

| Sample                    | Ti <sup>3+</sup> /Ti species <sup>a</sup> |
|---------------------------|-------------------------------------------|
| BT                        | 0.22                                      |
| BT-MoS <sub>2</sub> (2/1) | 0.18                                      |
| BT-MoS <sub>2</sub> (1/1) | 0.15                                      |
| BT-MoS <sub>2</sub> (1/2) | 0.11                                      |

<sup>a</sup> Calculated by the (peak area of Ti<sup>3+</sup> species)/[(peak area of Ti<sup>3+</sup> species) + (peak area of Ti<sup>4+</sup> species)].



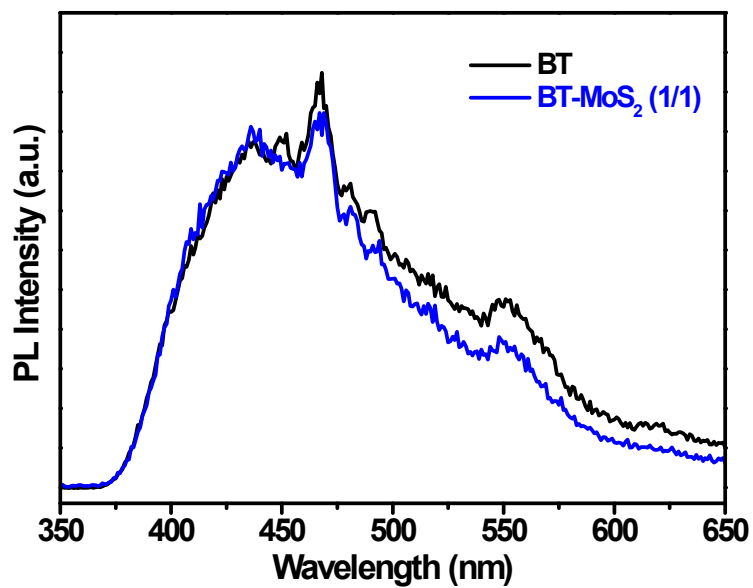

Fig. S7 PL spectra of BT and BT-MoS<sub>2</sub> (1/1) samples.

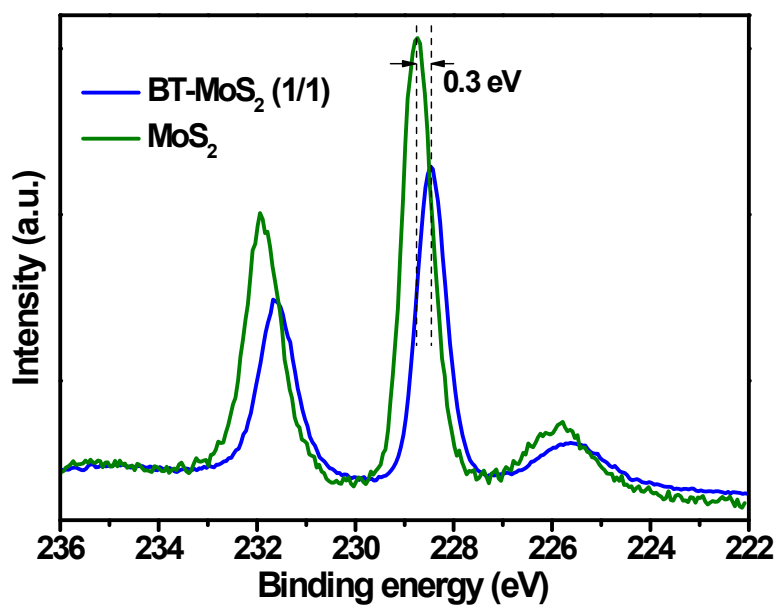

Fig. S8 XPS Mo3d spectra of MoS<sub>2</sub> and BT-MoS<sub>2</sub> (1/1) samples.

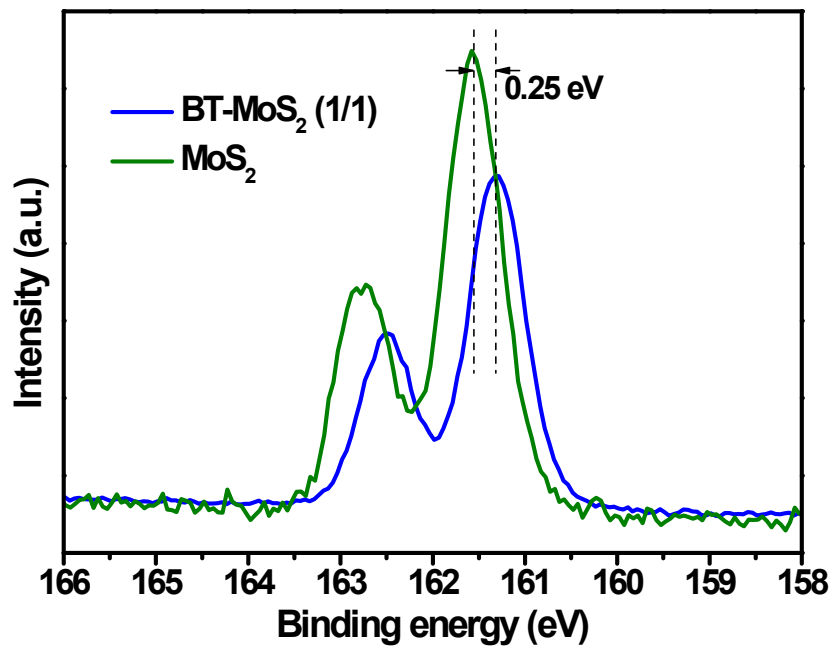

Fig. S9 XPS S2p spectra of MoS<sub>2</sub> and BT-MoS<sub>2</sub> (1/1) samples.

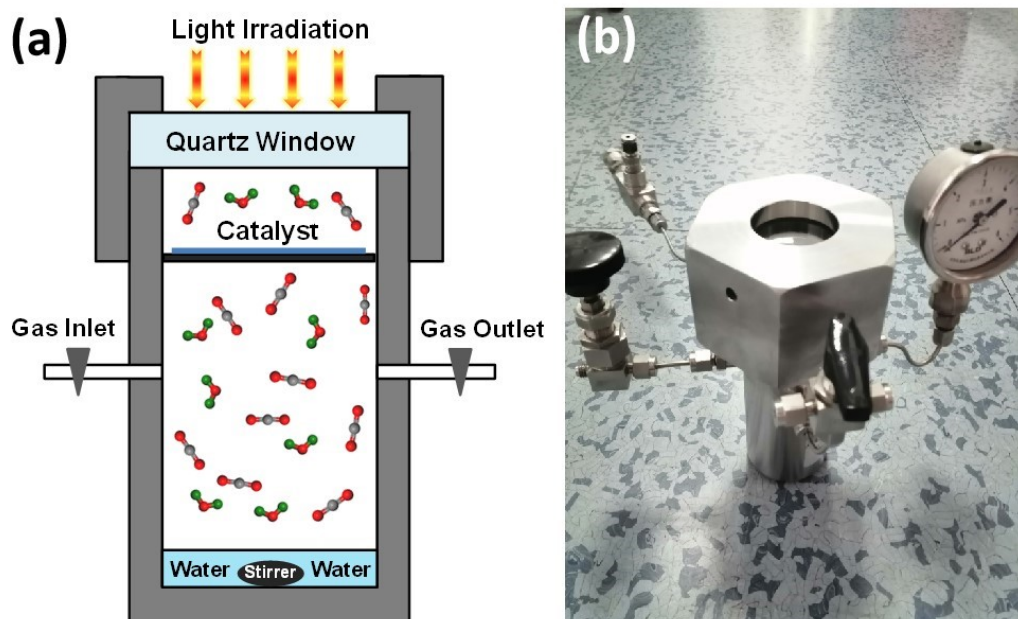

Fig. S10 (a) Schematic diagram and (b) actual object of the reactor for photocatalytic CO<sub>2</sub> reduction with moisture.

**Table S3.** Comparison of photocatalytic activity of CO<sub>2</sub> reduction over TiO<sub>2</sub>-based catalysts.

| Catalyst                                               | Reaction conditions                                                                    | STY of CH <sub>4</sub><br>( $\mu\text{mol g}^{-1} \text{h}^{-1}$ ) | By-product                                                    | Reference |
|--------------------------------------------------------|----------------------------------------------------------------------------------------|--------------------------------------------------------------------|---------------------------------------------------------------|-----------|
| BP-BT                                                  | 300 W Xe lamp, 2 bar, 6 mL H <sub>2</sub> O                                            | 16.8                                                               | H <sub>2</sub> , CO                                           | S1        |
| H-TiO <sub>2-x</sub>                                   | 300 W Xe lamp, 2 bar, 6 mL H <sub>2</sub> O                                            | 16.2                                                               | H <sub>2</sub> , CO                                           | S2        |
| BT                                                     | 300 W Xe lamp, 2 bar, 6 mL H <sub>2</sub> O                                            | 14.3                                                               | H <sub>2</sub> , CO                                           | S3        |
| P25                                                    | 200 W Xe lamp, UV-Vis ( $\lambda = 320 \sim 780 \text{ nm}$ ), 2 bar                   | 1.2                                                                | CO, H <sub>2</sub>                                            | S4        |
| TiO <sub>2</sub> with {001} and {101} facets           | 300 W Xe lamp, ambient temperature, atmospheric pressure                               | 1.35                                                               | —                                                             | S5        |
| TiO <sub>2</sub> powder                                | 75 W Hg lamp, $\lambda > 280 \text{ nm}$                                               | 0.02                                                               | C <sub>2</sub> H <sub>4</sub> , C <sub>2</sub> H <sub>6</sub> | S6        |
| Anatase particles                                      | 990 W Xe lamp, 0.96 KW m <sup>-2</sup> , 90 bar                                        | 1.8                                                                | —                                                             | S7        |
| Ti-PS (Si/Ti = 50, hexagonal)                          | 100 W Hg lamp, UV irradiation, 323 K                                                   | 7.1                                                                | CH <sub>3</sub> OH                                            | S8        |
| Extracted TiO <sub>2</sub>                             | UV 8 W Hg lamp, $\lambda = 254 \text{ nm}$ , supercritical fluid-grade CO <sub>2</sub> | $\sim 4.3$                                                         | —                                                             | S9        |
| Ti-beta(OH)                                            | 100 W Hg lamp, $\lambda > 250 \text{ nm}$                                              | 5.8                                                                | CH <sub>3</sub> OH                                            | S10       |
| 14 nm anatase particles                                | 8 W Hg lamp, $\lambda = 254 \text{ nm}$ , supercritical fluid-grade CO <sub>2</sub>    | 0.4                                                                | CH <sub>3</sub> OH, H <sub>2</sub> , CO                       | S11       |
| P25 particles                                          | 15 W UV or near-UV lamp, $\lambda = 365$ or $254 \text{ nm}$ , 316 K                   | 4.11                                                               | CO, C <sub>2</sub> H <sub>6</sub>                             | S12       |
| TiO <sub>2</sub> pellets                               | Three germicidal UVC lamps, $\lambda = 253.7 \text{ nm}$                               | 0.22 ( $\mu\text{mol h}^{-1}$ )                                    | H <sub>2</sub> , CO                                           | S13       |
| P25 particles                                          | 1000 W Xe lamp, $\lambda < 700 \text{ nm}$ , 343 K                                     | 0.1                                                                | H <sub>2</sub> , CO                                           | S14       |
| Self-doped Ti <sup>3+</sup> -rutile TiO <sub>2</sub>   | 300 W Xe lamp, Vis-light, 1 atm                                                        | < 0.1                                                              | —                                                             | S15       |
| Black TiO <sub>2</sub> films                           | Simulated sunlight, room temperature, continuous CO <sub>2</sub>                       | 12.0                                                               | CO                                                            | S16       |
| Ti <sup>3+</sup> -self doped brookite TiO <sub>2</sub> | 300 W Xe lamp, Vis-light, continuous CO <sub>2</sub>                                   | 11.9                                                               | CO                                                            | S17       |
| Reduced {001}-TiO <sub>2-x</sub>                       | 300 W Xe lamp, AM1.5                                                                   | < 0.3                                                              | CO                                                            | S18       |
| BT-MoS <sub>2</sub> (1/1)                              | 300 W Xe lamp, simulated solar, 2 bar                                                  | 18.1                                                               | H <sub>2</sub> , CO                                           | this work |

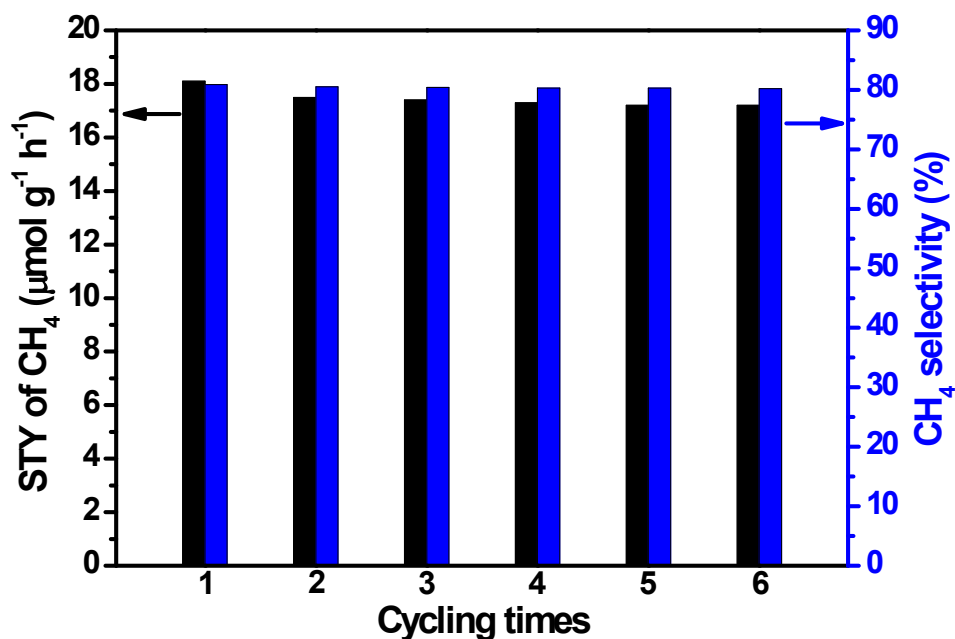

**Fig. S11** Recycling of BT-MoS<sub>2</sub> (1/1) catalyst for photocatalytic CO<sub>2</sub> reduction to CH<sub>4</sub> under solar light irradiation. Reaction conditions: 50 mg catalyst, 2 bar CO<sub>2</sub>, 6 mL H<sub>2</sub>O, 5 h in each run.

**Table S4.** The CH<sub>4</sub> generation rate of photocatalytic CO<sub>2</sub> reduction over TiO<sub>2</sub>, BT, and BT-MoS<sub>2</sub> (1/1) samples.<sup>a</sup>

| Catalyst                  | Substrate                                       | STY <sup>b</sup> of CH <sub>4</sub> |
|---------------------------|-------------------------------------------------|-------------------------------------|
| TiO <sub>2</sub>          | H <sub>2</sub> O/CO <sub>2</sub>                | 1.8                                 |
| TiO <sub>2</sub>          | D <sub>2</sub> O/CO <sub>2</sub>                | 1.2                                 |
| TiO <sub>2</sub>          | H <sub>2</sub> O/ <sup>13</sup> CO <sub>2</sub> | 1.0                                 |
| TiO <sub>2</sub>          | D <sub>2</sub> O/ <sup>13</sup> CO <sub>2</sub> | 0.6                                 |
| BT                        | H <sub>2</sub> O/CO <sub>2</sub>                | 14.3                                |
| BT                        | D <sub>2</sub> O/CO <sub>2</sub>                | 10.2                                |
| BT                        | H <sub>2</sub> O/ <sup>13</sup> CO <sub>2</sub> | 8.4                                 |
| BT                        | D <sub>2</sub> O/ <sup>13</sup> CO <sub>2</sub> | 5.6                                 |
| BT-MoS <sub>2</sub> (1/1) | H <sub>2</sub> O/CO <sub>2</sub>                | 18.1                                |
| BT-MoS <sub>2</sub> (1/1) | D <sub>2</sub> O/CO <sub>2</sub>                | 13.9                                |
| BT-MoS <sub>2</sub> (1/1) | H <sub>2</sub> O/ <sup>13</sup> CO <sub>2</sub> | 11.3                                |
| BT-MoS <sub>2</sub> (1/1) | D <sub>2</sub> O/ <sup>13</sup> CO <sub>2</sub> | 7.5                                 |

<sup>a</sup> Reaction conditions: 50 mg catalyst, 2 bar CO<sub>2</sub>, 6 mL H<sub>2</sub>O, solar light for 5 h.

<sup>b</sup> The unit of STY is μmol g<sup>-1</sup> h<sup>-1</sup>.

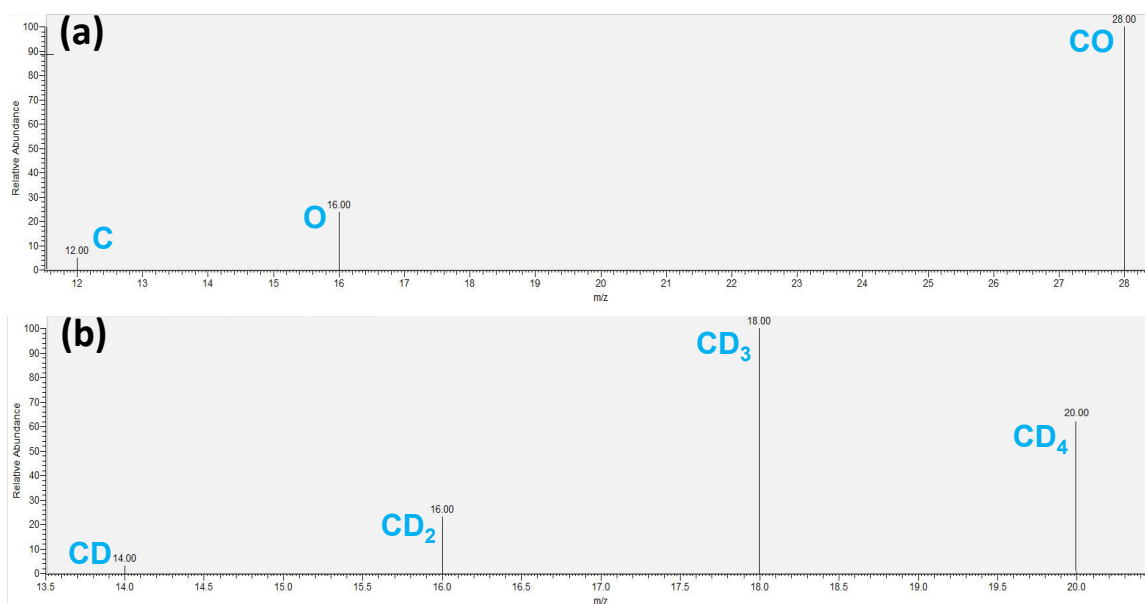

**Fig. S12** GC-MS data of (a) CO and (b) CD<sub>4</sub> generated over BT-MoS<sub>2</sub> (1/1) sample photocatalyzed D<sub>2</sub>O/CO<sub>2</sub> transformation under solar light irradiation.

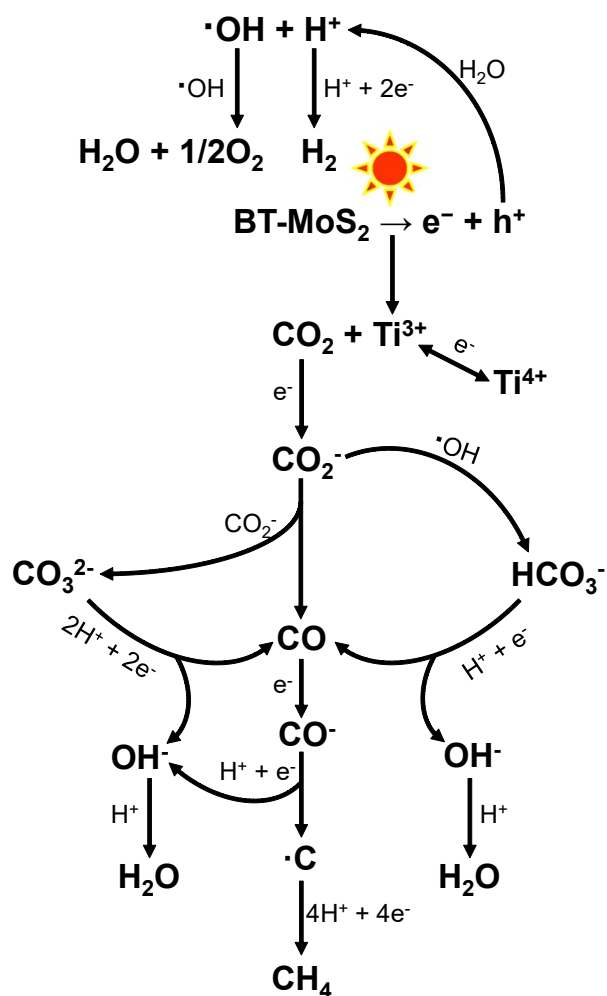

**Scheme S1** Proposed reaction mechanism of the photocatalytic CO<sub>2</sub> reduction over BT-MoS<sub>2</sub> catalyst.

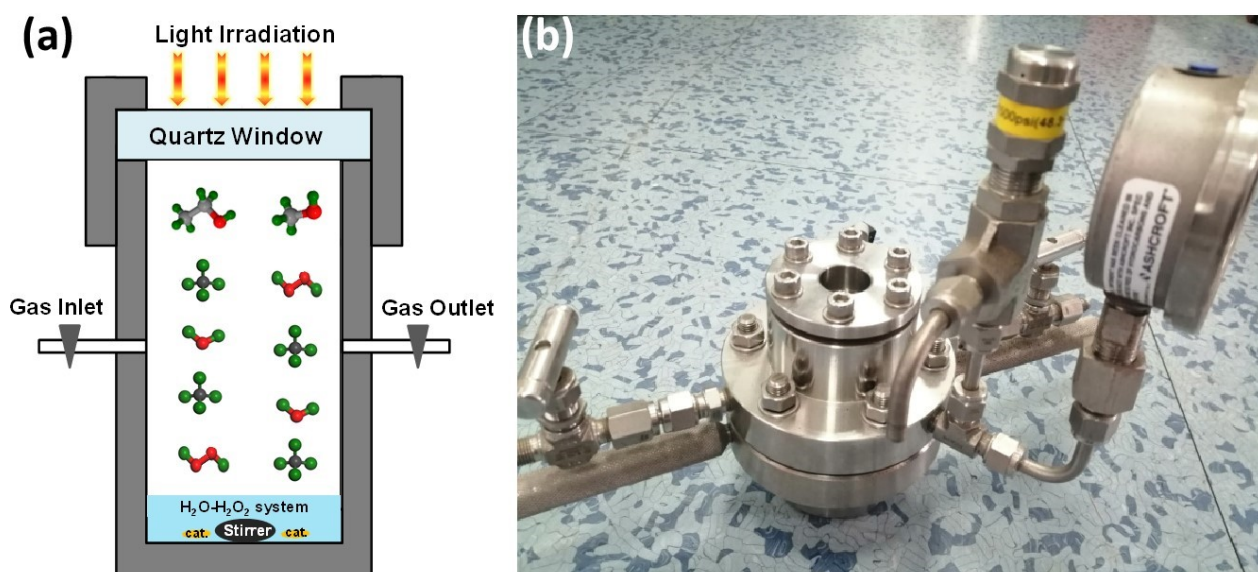

**Fig. S13** (a) Schematic diagram and (b) actual object of the reactor for  $\text{H}_2\text{O}_2$ -assisted photocatalytic  $\text{CH}_4$  transformation.

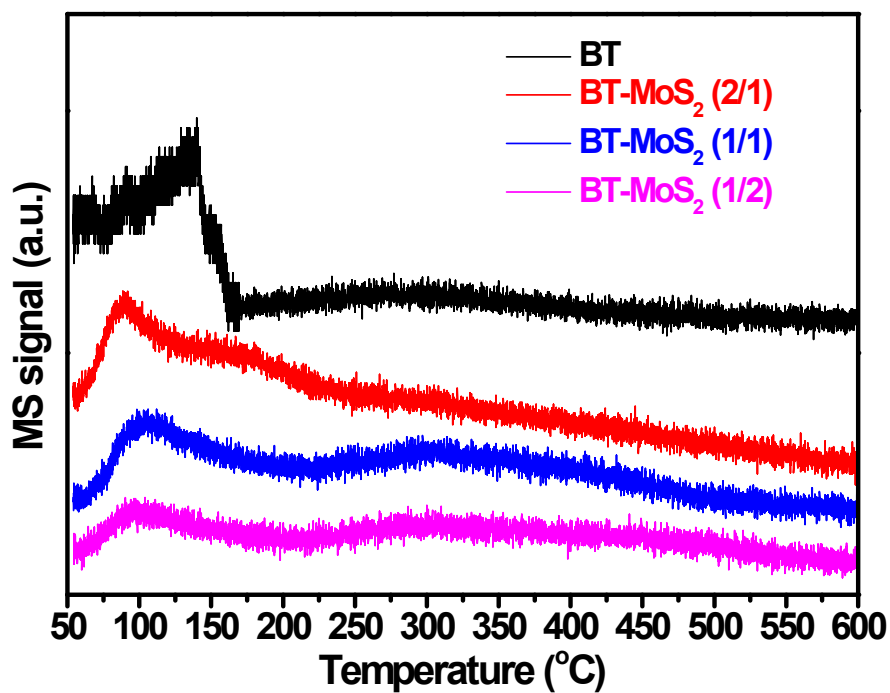

**Fig. S14**  $\text{CH}_4$ -TPD profiles of BT and BT- $\text{MoS}_2$  samples.

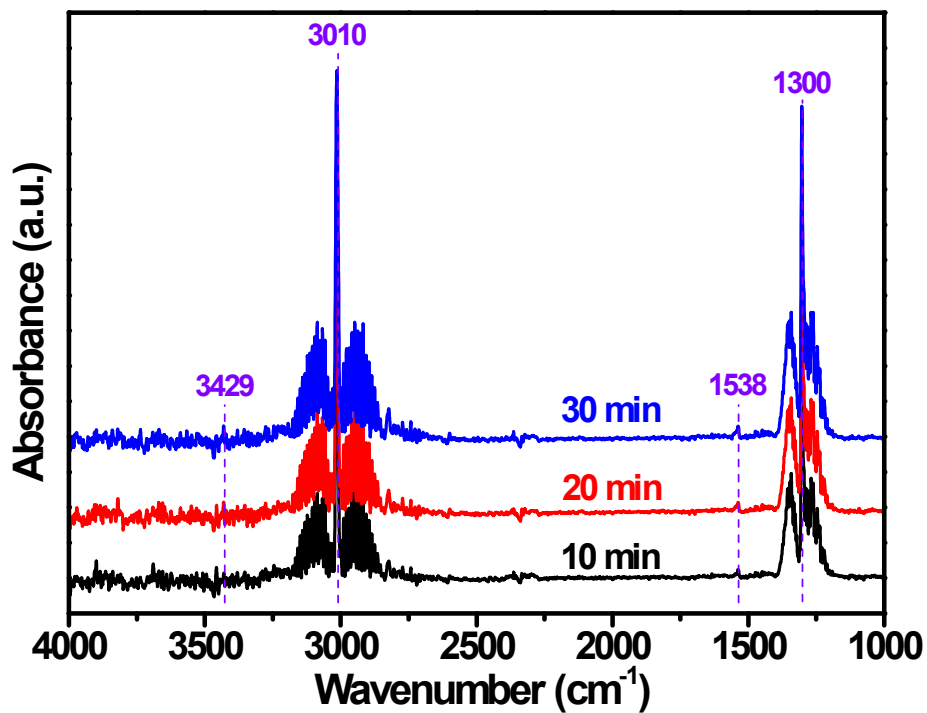

**Fig. S15** *In situ* DRIFT spectra of CH<sub>4</sub>-H<sub>2</sub>O<sub>2</sub> adsorption on BT-MoS<sub>2</sub> (1/1) sample. Note that the peaks at 1300 and 1538 cm<sup>-1</sup> are attributed to the C-H deformation vibration of CH<sub>4</sub> and C-H symmetric deformation vibrational mode of CH<sub>4</sub>,<sup>S19</sup> respectively. The peaks at 3010 and 3429 cm<sup>-1</sup> are ascribed to the OH species.<sup>S19</sup>

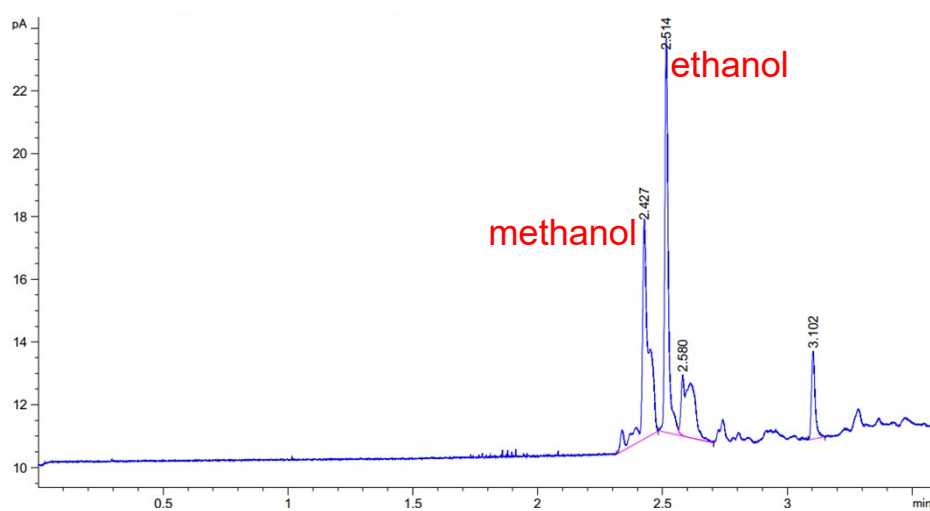

**Fig. S16** GC-FID data of solar-light-driven photocatalytic CH<sub>4</sub> oxidation to alcohols over BT-MoS<sub>2</sub> (1/1).

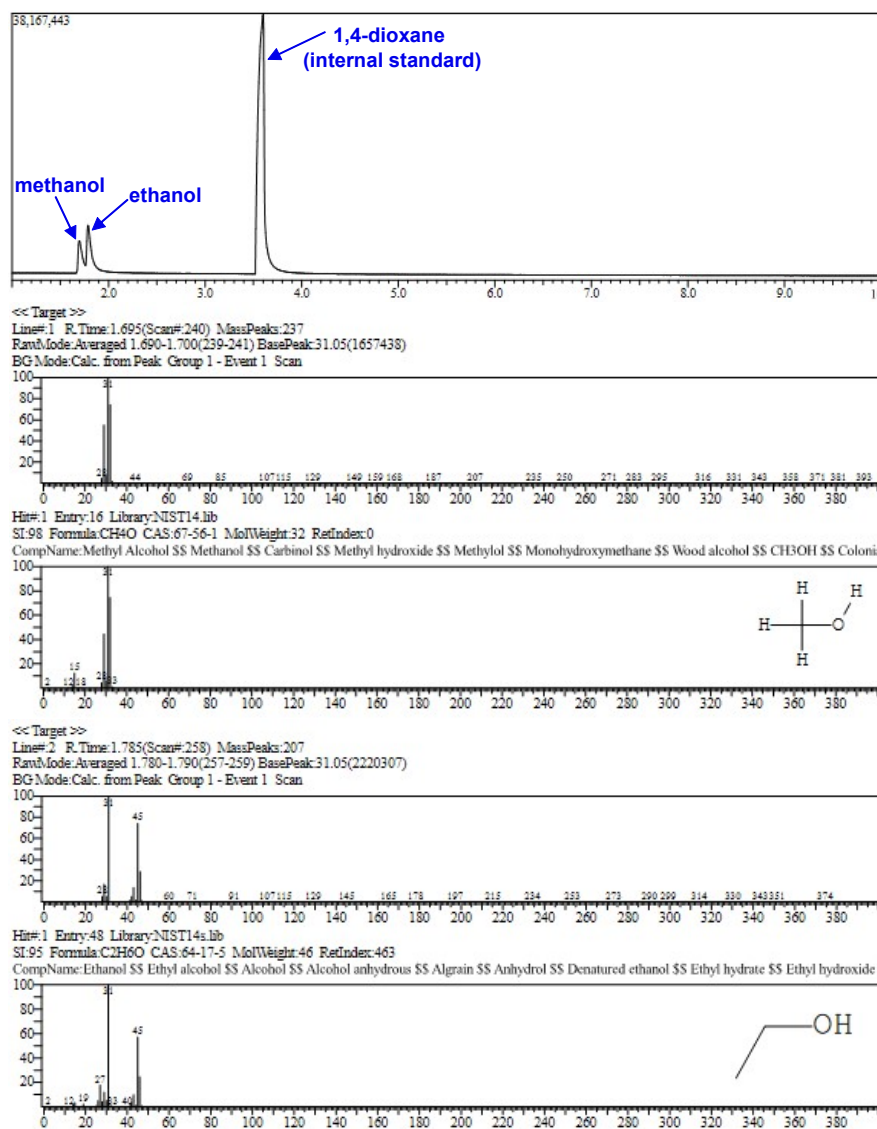

**Fig. S17** GC-MS data of solar-light-driven photocatalytic CH<sub>4</sub> oxidation to alcohols over BT-MoS<sub>2</sub> (1/1).

**Table S5.** Comparison of photocatalytic activity of CH<sub>4</sub> oxidation to alcohols over solid catalysts.

| Catalyst                           | Reaction conditions                                                                                                                 | STY of methanol<br>( $\mu\text{mol g}^{-1} \text{h}^{-1}$ ) | STY of ethanol<br>( $\mu\text{mol g}^{-1} \text{h}^{-1}$ ) | alcohol<br>sel. (%) | Ref. |
|------------------------------------|-------------------------------------------------------------------------------------------------------------------------------------|-------------------------------------------------------------|------------------------------------------------------------|---------------------|------|
| Ag <sub>2</sub> O@WO <sub>3</sub>  | 100 mJ and 355 nm<br>laser beam, 100 mL<br>min <sup>-1</sup> CH <sub>4</sub> , 70 mL H <sub>2</sub> O                               | 600                                                         | 0                                                          | —                   | S20  |
| BiVO <sub>4</sub>                  | 350 W Xe lamp, 10%<br>CH <sub>4</sub> /Ar with bubbler,<br>20 mL H <sub>2</sub> O, 65 °C                                            | 134                                                         | 0                                                          | 85                  | S21  |
| FeO <sub>x</sub> /TiO <sub>2</sub> | 300 W Xe lamp, 70<br>$\mu\text{mol}$ CH <sub>4</sub> , 8 $\mu\text{mol}$<br>H <sub>2</sub> O <sub>2</sub> in 10 mL H <sub>2</sub> O | 352                                                         | 26.5                                                       | 97                  | S22  |



|                                                                     |                                                                                                                                                                                     |                                                     |       |      |           |
|---------------------------------------------------------------------|-------------------------------------------------------------------------------------------------------------------------------------------------------------------------------------|-----------------------------------------------------|-------|------|-----------|
| Cu-0.5/PCN                                                          | 500 W Xe lamp, 10 mL min <sup>-1</sup> CH <sub>4</sub> , 90 mL min <sup>-1</sup> N <sub>2</sub> , 25 mL H <sub>2</sub> O                                                            | 24.5                                                | 106   | 81.2 | S23       |
| g-C <sub>3</sub> N <sub>4</sub> @Cs <sub>0.33</sub> WO <sub>3</sub> | 300 W Xe lamp, 1000 ppm CH <sub>4</sub> in air                                                                                                                                      | 4.38                                                | 0     | 51.6 | S24       |
| Au-CoO <sub>x</sub> /TiO <sub>2</sub>                               | 300 W Xe lamp, 0.1 MPa O <sub>2</sub> and 2 MPa CH <sub>4</sub> , 100 mL H <sub>2</sub> O                                                                                           | 2540 for CH <sub>3</sub> OH and CH <sub>3</sub> OOH | 0     | 95   | S19       |
| Fe <sup>3+</sup> -WO <sub>3</sub> /KIT-6                            | mercury-vapor lamp, 4.5 mL min <sup>-1</sup> CH <sub>4</sub> , 17.9 mL min <sup>-1</sup> He, 300 mL H <sub>2</sub> O, 55 °C                                                         | 67.5                                                | 0     | 58.5 | S25       |
| WO <sub>3</sub> /La                                                 | mercury-vapor lamp, 4.5 mL min <sup>-1</sup> CH <sub>4</sub> , 17.9 mL min <sup>-1</sup> He, 300 mL H <sub>2</sub> O, 55 °C                                                         | 31.3                                                | 0     | 47   | S26       |
| CeO <sub>2</sub> -1100                                              | 300 W Xe lamp, 4 mL min <sup>-1</sup> CH <sub>4</sub> , 15 mL H <sub>2</sub> O                                                                                                      | 0                                                   | 11.4  | 91.5 | S27       |
| RCN-5                                                               | 300 W Xe lamp, 0.1 MPa O <sub>2</sub> and 2 MPa CH <sub>4</sub> , 20 mL H <sub>2</sub> O                                                                                            | 30                                                  | 281.6 | 82   | S28       |
| TiO <sub>2</sub>                                                    | 300 W Xe lamp, 3 MPa CH <sub>4</sub> , 2 mL 0.01 M FeCl <sub>2</sub> , 200 μL H <sub>2</sub> O <sub>2</sub> , 20 mL H <sub>2</sub> O                                                | 471                                                 | 0     | 83   | S29       |
| Au/ZnO                                                              | 300 W Xe lamp, 0.1 MPa O <sub>2</sub> and 2 MPa CH <sub>4</sub> , 100 mL H <sub>2</sub> O                                                                                           | 2060                                                | 0     | 15.6 | S30       |
| Au/ZnO                                                              | 300 W Xe lamp, 5 bar O <sub>2</sub> and 15 bar CH <sub>4</sub> , 10 mL H <sub>2</sub> O                                                                                             | 685                                                 | 0     | 99.1 | S31       |
| FeOOH/m-WO <sub>3</sub>                                             | 300 W Xe lamp, visible light source, 10 mL min <sup>-1</sup> CH <sub>4</sub> , 90 mL min <sup>-1</sup> N <sub>2</sub> , 2 mL H <sub>2</sub> O <sub>2</sub> , 18 mL H <sub>2</sub> O | 211.2                                               | 0     | 91   | S32       |
| BT-MoS <sub>2</sub> (1/1)                                           | 300 W Xe lamp, 20 bar CH <sub>4</sub> , 1 mL 30% H <sub>2</sub> O <sub>2</sub> and 9 mL H <sub>2</sub> O                                                                            | 52.6                                                | 68.5  | 95.6 | this work |

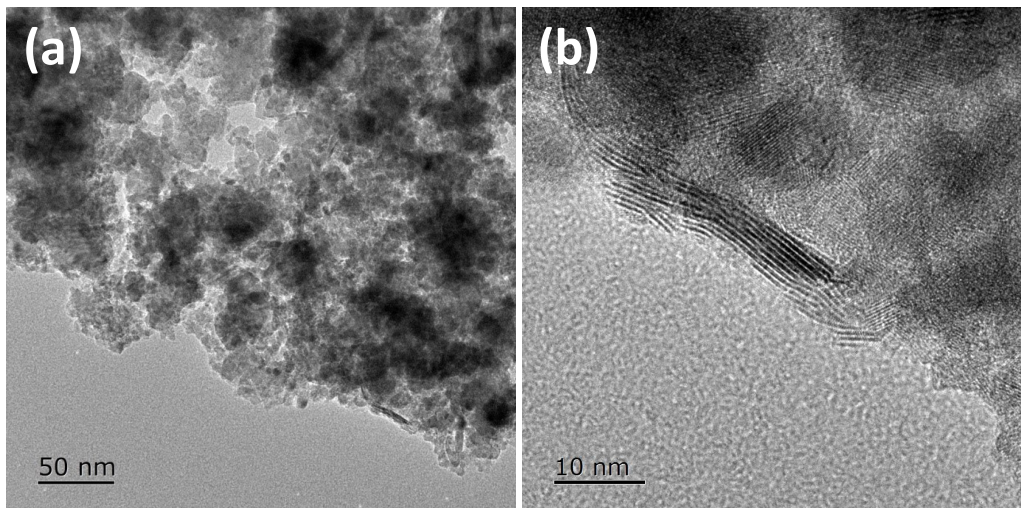

Fig. S18 HRTEM images of the used BT-MoS<sub>2</sub> (1/1) catalyst.

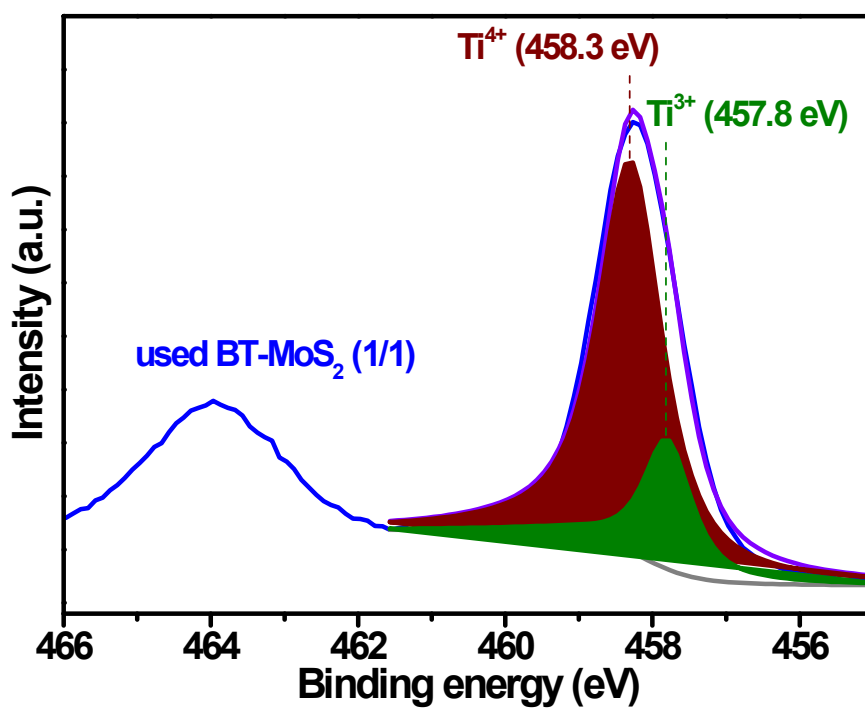

Fig. S19 XPS Ti2p spectrum of the used BT-MoS<sub>2</sub> (1/1) catalyst.

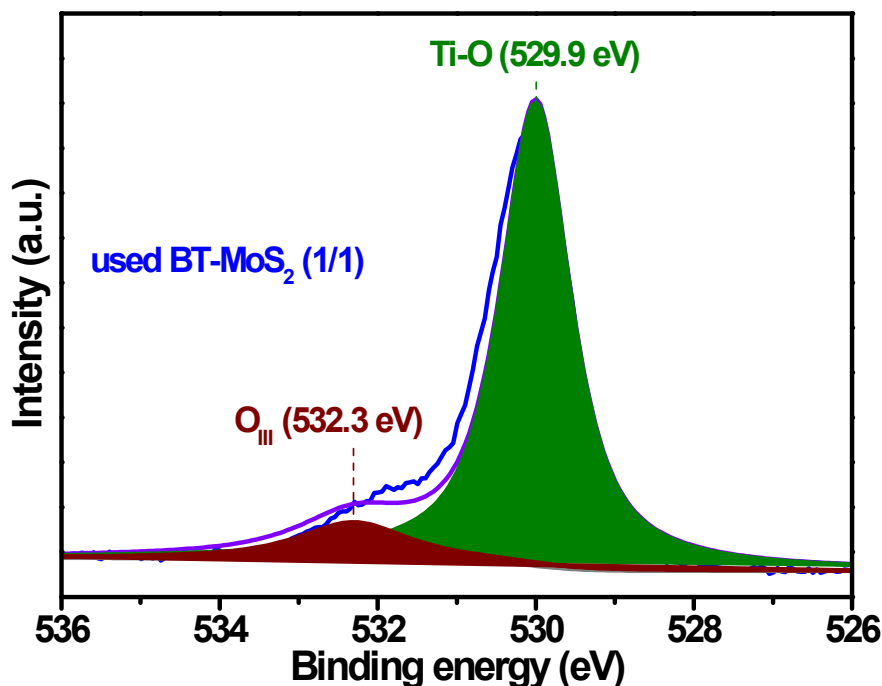

Fig. S20 XPS O1s spectrum of the used BT-MoS<sub>2</sub> (1/1) catalyst.

### Supplementary References:

- (S1) Q. Bi, K. Hu, J. Chen, Y. Zhang, M. S. Riaz, J. Xu, Y. Han, F. Huang, *Appl. Catal. B* 2021, **295**, 120211.
- (S2) G. Yin, X. Huang, T. Chen, W. Zhao, Q. Bi, J. Xu, Y. Han, F. Huang, *ACS Catal.* 2018, **8**, 1009.
- (S3) G. Yin, Q. Bi, W. Zhao, J. Xu, T. Lin, F. Huang, *ChemCatChem* 2017, **9**, 4389.
- (S4) Q. Zhai, S. Xie, W. Fan, Q. Zhang, Y. Wang, W. Deng, Y. Wang, *Angew. Chem. Int. Ed.* 2013, **52**, 5776.
- (S5) J. Yu, J. Low, W. Xiao, P. Zhou, M. Jaroniec, *J. Am. Chem. Soc.* 2014, **136**, 8839.
- (S6) M. Anpo, H. Yamashita, Y. Ichihashi, S. Ehara, *J. Electroanal. Chem.* 1995, **396**, 21.
- (S7) S. Kaneco, H. Kurimoto, Y. Shimizu, K. Ohta, T. Mizuno, *Energy* 1999, **24**, 21.
- (S8) K. Ikeue, S. Nozaki, M. Ogawa, M. Anpo, *Catal. Today* 2002, **74**, 241.
- (S9) K. Koci, L. Matejova, L. Obalova, L. Capek, J. C. S. Wu, *J. Sol-Gel Sci. Techn.* 2015, **3**, 621.
- (S10) K. Ikeue, H. Yamashita, M. Anpo, T. Takewaki, *J. Phys. Chem. B* 2001, **105**, 8350.
- (S11) K. Koci, L. Obalova, L. Matejova, D. Placha, Z. Lacny, J. Jirkovsky, O. Solcova, *Appl. Catal. B* 2009, **89**, 494.
- (S12) C. C. Lo, C. H. Hung, C. S. Yuan, J. F. Wu, *Sol. Energy Mater. Sol. Cells* 2007, **91**, 1765.
- (S13) S. S. Tan, L. Zou, E. Hu, *Sci. Technol. Adv. Mater.* 2007, **8**, 89.
- (S14) F. Saladin, L. Forss, I. Kamber, *J. Chem. Soc. Chem. Commun.* 1995, 533.
- (S15) K. Sasan, F. Zuo, Y. Wang, P. Feng, *Nanoscale* 2015, **7**, 13369.
- (S16) Q. Wang, Z. Zhang, X. Cheng, Z. Huang, P. Dong, Y. Chen, X. Zhang, *J. CO<sub>2</sub> Util.* 2015, **12**, 7.
- (S17) X. Xin, T. Xu, L. Wang, C. Wang, *Sci. Rep.* 2016, **6**, 23684.
- (S18) W. Fang, L. Khrouz, Y. Zhou, B. Shen, C. Dong, M. Xing, S. Mishra, S. Daniele, J. Zhang, *Phys. Chem. Chem. Phys.* 2017, **19**, 13875.

- (S19) H. Song, X. Meng, S. Wang, W. Zhou, S. Song, T. Kako, J. Ye, *ACS Catal.* 2020, **10**, 14318.
- (S20) A. Hameed, I. M. I. Ismail, M. Aslam, M. A. Gondal, *Appl. Catal. A* 2014, **470**, 327.
- (S21) W. Zhu, M. Shen, G. Fan, A. Yang, J. R. Meyer, Y. Ou, B. Yin, J. Fortner, M. Foston, Z. Li, Z. Zou, B. Sadtler, *ACS Appl. Nano Mater.* 2018, **1**, 6683.
- (S22) J. Xie, R. Jin, A. Li, Y. Bi, Q. Ruan, Y. Deng, Y. Zhang, S. Yao, G. Sankar, D. Ma, J. Tang, *Nat. Catal.* 2018, **1**, 889.
- (S23) Y. Zhou, L. Zhang, W. Wang, *Nat. Commun.* 2019, **10**, 506.
- (S24) Y. Li, J. Li, G. Zhang, K. Wang, X. Wu, *ACS Sustainable Chem. Eng.* 2019, **7**, 4382.
- (S25) K. Villa, S. Murcia-López, T. Andreu, J. R. Morante, *Appl. Catal. B* 2015, **163**, 150.
- (S26) K. Villa, S. Murcia-López, J. R. Morante, T. Andreu, *Appl. Catal. B* 2016, **187**, 30.
- (S27) J. Du, W. Chen, G. Wu, Y. Song, X. Dong, G. Li, J. Fang, W. Wei, Y. Sun, *Catalysts* 2020, **10**, 196.
- (S28) Z. Yang, Q. Zhang, L. Ren, X. Chen, D. Wang, L. Liu, J. Ye, *Chem. Commun.* 2021, **57**, 871.
- (S29) Y. Zeng, H. C. Liu, J. S. Wang, X. Y. Wu, S. L. Wang, *Catal. Sci. Technol.* 2020, **10**, 2329.
- (S30) H. Song, X. Meng, S. Wang, W. Zhou, X. Wang, T. Kako, J. Ye, *J. Am. Chem. Soc.* 2019, **141**, 20507.
- (S31) W. Zhou, X. Qiu, Y. Jiang, Y. Fan, S. Wei, D. Han, L. Niu, Z. Tang, *J. Mater. Chem. A* 2020, **8**, 13277.
- (S32) J. Yang, J. Hao, J. Wei, J. Dai, Y. Li, *Fuel* 2020, **266**, 117104.
